# Supplementary material
Source: MDPI journal article supplement (https://www.mdpi.com/2072-4292/14/22/5829)
Supplement: s1 [file s1 › remotesensing-1967591-supplementary.pdf]

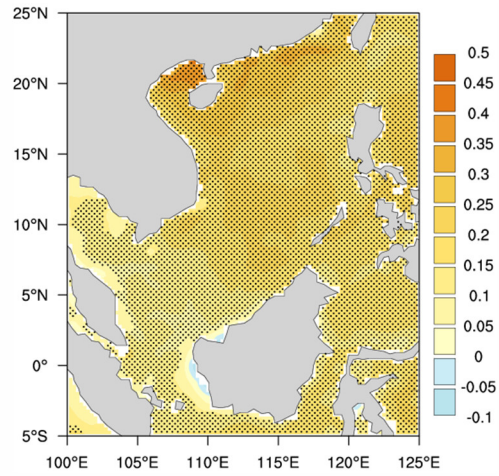

**Figure S1.** Spatial patterns of linear SST changes (units: °C per decade) in the SCS in warm season during 1982–2020. The black dots indicate statistically significant trends at 0.05 level using the Mann-Kendall test of each grid point.
